# Supplementary material for: PLX4032 resistance of patient-derived melanoma cells: crucial role of oxidative metabolism
Source: Front Oncol. 2023 Jul 18;13:1210130. doi: 10.3389/fonc.2023.1210130 (PMC10391174; doi:10.3389/fonc.2023.1210130)
Supplement: Supplementary file 1 [file DataSheet_1.docx]

Supplementary Material

PLX4032 resistance of patient-derived melanoma cells: crucial role of oxidative metabolism

**Ombretta Garbarino1✝, Giulia Elda Valenti1✝, Lorenzo Monteleone1, Gabriella Pietra1,2, Mingari Maria Cristina1,2, Andrea Benzi3, Santina Bruzzone2,3, Silvia Ravera4, Riccardo Leardi5, Emanuele Farinini5, Stefania Vernazza1, Melania Grottoli1, Barbara Marengo1✝ and Cinzia Domenicotti1*✝**

**✝** These authors contributed equally to this work

*** Correspondence:**Cinzia Domenicotti[cinzia.domenicotti@unige.it](mailto:cinzia.domenicotti@unige.it)


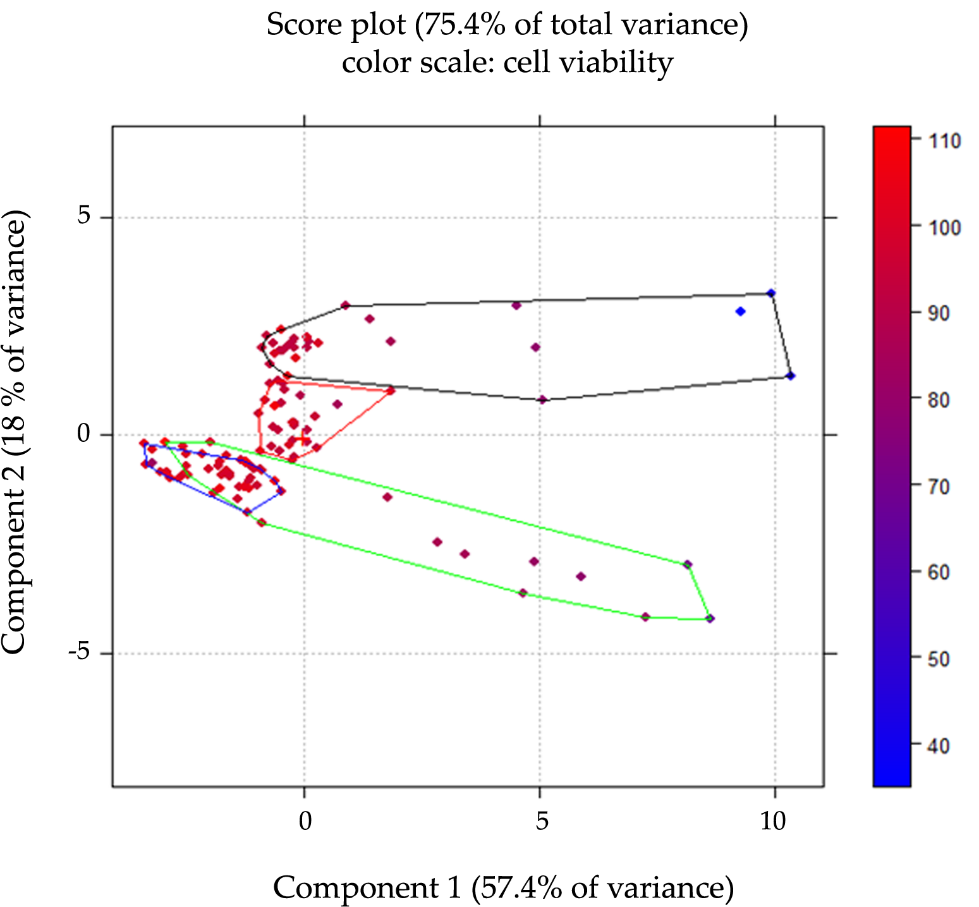


**Supplementary Figure 1.** Supplementary data. The score plot displays the objects in the component space, with each sample connected by a convex hull according to the cell line and the type of resistance (MeOV-DMSO-R, MeOV-PLX-R, MeTA-DMSO-R, MeTA-PLX-R) and colored according to the independently measured viability variable (r=-0.89; p<0.05).
